arrhythmias and serious hemodynamic fluctuations during excision of the pheochromocytoma. However, following excision of the tumor, the patient developed hypotension, bradycardia, and pulmonary edema. This may be attributed to the sudden withdrawal of the circulating catecholamine,<sup>5</sup> in the presence of residual effects of verapamil. Verapamil is a relatively long-acting drug.<sup>6</sup> It may be advisable to select a shorter-acting calcium channel blocker with less cardiac effects, such as nicardipine,<sup>7</sup> in order to minimize side effects following excision of the pheochromocytoma and withdrawal of the circulating catecholamines.

ANIS BARAKA, M.D.  
*Professor and Chairman*

NADA USTA, M.D.  
*Clinical Fellow*

FIRYAL YAMUT, M.D.  
*Chief Resident*

SANIA HAROUN, M.D.  
*Assistant Professor*

*Department of Anesthesiology  
American University of Beirut  
Beirut, Lebanon*

#### REFERENCES

1. Langer SZ, Hicks PE: Physiology of the sympathetic nerve ending. *Br J Anaesth* 56:689-700, 1984
2. Sumikawa K, Matsumoto T, Ishizaka N, Nagai H, Amenomori Y, Amakata Y: Mechanism of differential effect of halothane on nicotinic and muscarinic receptor mediated responses of the dog adrenal medulla. *ANESTHESIOLOGY* 57:444, 1982
3. Kates RA, Kaplan JA: Calcium channel blocking drugs, *Cardiac Anaesthesia*, Vol 2, Cardiovascular Pharmacology. Edited by Joel A. Kaplan. Grune and Stratton, 1983, p 209
4. Kapur PA, Placke WE: Epinephrine-induced arrhythmias and cardiovascular function after verapamil during halothane anesthesia in the dog. *ANESTHESIOLOGY* 55:218-225, 1981
5. Desmots JM, Marty J: Anaesthetic management of patients with pheochromocytoma. *Br J Anaesth* 56:781-789, 1984
6. Reiter MJ, Shank DG, Aanonsen LM, Wagomer R, McCarthy E, Pritchett ELC: Pharmacokinetics of verapamil, experience with a sustained intravenous infusion of regimen. *Am J Cardiol* 50: 716-721, 1982
7. Arai T, Hatano Y, Ishida H, Mori K: Use of nicardipine in the anesthetic management of pheochromocytoma. *Anesth Analg* 65:706-708, 1986

(Accepted for publication January 8, 1987.)

Anesthesiology  
66:706-707, 1987

### Hetastarch Coagulopathy in a Neurosurgical Patient

*To the Editor:*—We wish to report a patient who developed a coagulopathy postoperatively, which we believe was most likely due to hetastarch. The patient, a 36-year-old, 60-kg woman, underwent a subtemporal craniotomy for removal of a recurrent epidermoid cyst, the initial removal having been performed uneventfully 2 yr earlier. She had had two other operations, a cholecystectomy and a vaginal hysterectomy, within the past 5 yr without complications. Her only medication was cimetidine for a probable peptic ulcer. Her preoperative laboratory values, including a prothrombin time (PT), partial thromboplastin time (PTT), and platelet count, were normal. Anesthesia for the craniotomy consisted of nitrous oxide 60%, thiopental infusion 2100 mg iv, meperidine 100 mg iv, and a nondepolarizing muscle relaxant iv. Fluid replacement during the 7-h operation consisted of lactated Ringer's solution, 700 ml, and hetastarch 6%, 2000 ml iv.

Near the end of the operation, the surgeons noted unusual difficulty obtaining hemostasis. Coagulation studies showed a PTT 46 s (normal 34 s) with a normal PT and platelet count. Despite the administration of three units of fresh frozen plasma (FFP), the PTT increased to 56 s. Additional coagulation abnormalities included an increase

in fibrin split products to 20 mcg/ml (normal 10) and a shortened thrombin time (12 s). During the night, the patient developed a right hemiparesis and anisocoria. An emergency head CT scan showed a large hematoma in the left temporal lobe with a moderate mass effect. Because of the coagulopathy, the decision was made not to evacuate the clot. After administration of a total of 15 units of FFP over the next 2 days, the PTT returned to normal. The patient was discharged 9 days postoperatively, with her only disorder being a mild expressive dysphasia.

Hetastarch 6%, a heterogenous mixture of synthetic polysaccharides resembling glycogen, produces effective, prolonged intravascular volume expansion (24-48 h), which is clinically equivalent to, but considerably less expensive than, albumin.<sup>1</sup> Because of these effects, we have chosen to administer hetastarch for volume expansion in selected neurosurgical patients, where we believe that the administration of crystalloid solution might precipitate or exacerbate cerebral edema. Studies in human volunteers indicate that hetastarch may prolong the PTT, in association with a decrease in Factor VIII coagulant activity and related antigen, and a decrease in von Willebrand

factor,<sup>2</sup> while shortening thrombin and reptilase times and urokinase-activated clot lysis times, suggesting accelerated formation of fibrin clots and rapid fibrinolysis.<sup>3</sup> In a study in patients with multisystem trauma and shock, Shatney *et al.*<sup>4</sup> reported a significant prolongation of the PTT in those given hetastarch (average volume 3600 ml over 24 h) compared to albumin 5%, but unexpected bleeding did not occur. In preparing this communication, we were not able to find any report of clinically significant intra- or postoperative bleeding attributable to hetastarch. We believe our patient's course corresponds well with the known effects of hetastarch on coagulation: a prolongation of PTT, a decreased thrombin time, and evidence of accelerated fibrinolysis. While we cannot prove conclusively that the coagulopathy was due to hetastarch rather than some other coincidental cause, such as primary fibrinolysis or the excess release of brain phospholipids, we would like to alert anesthesiologists to this possibility. While our communication was under review, Symington,<sup>5</sup> a consulting hematologist to a neurosurgery service, reported in a letter to the editor two neurosurgical patients who received hetastarch and developed bleeding complications. As a consequence of both our and Symington's experiences, we are initiating a study of the effects of hetastarch on coagulation in neurosurgical patients.

MICHAEL D. CULLY, M.D.

Resident

C. PHILIP LARSON, JR., M.D.

Professor of Anesthesia and Surgery (Neurosurgery)

GERALD D. SILVERBERG, M.D.

Professor of Surgery (Neurosurgery)

Departments of Anesthesia and Surgery (Neurosurgery)

Stanford University School of Medicine

Stanford, California 94305

## REFERENCES

1. Hulse JD, Yacobi T: Hetastarch: An overview of the colloid and its metabolism. *Drug Intell Clin Pharmacol* 17:334-341, 1983
2. Stump DC, Strauss R, Henriksen RA, Petersen RE, Saunders R: Effects of hydroxyethyl starch on blood coagulation, particularly factor VIII. *Transfusion* 25:349-354, 1985
3. Strauss RG, Stump DC, Henriksen RA, Saunders R: Effects of hydroxyethyl starch on fibrinogen, fibrin clot formation and fibrinolysis. *Transfusion* 25:230-234, 1985
4. Shatney CH, Deepika K, Militello PR, Majerus TC, Dawson RD: Efficacy of hetastarch in the resuscitation of patients with multisystem trauma and shock. *Arch Surg* 118:804-809, 1983
5. Symington BE: Hetastarch and bleeding complications. *Ann Intern Med* 105:627-628, 1986

(Accepted for publication January 12, 1987.)

Anesthesiology  
66:707-708, 1987

## Dangers of Using an Improvised Underwater Seal for CPAP Oxygenation during One-lung Ventilation

*To the Editor:*—Arterial oxygenation during one-lung ventilation can be improved by insufflating oxygen to the non-ventilated lung at a constant positive airway pressure (CPAP).<sup>1</sup> Baraka *et al.*<sup>2</sup> have described a simple and inexpensive system for providing CPAP using an oxygen source, a flow meter, a manometer, and an underwater seal (fig. 1). They have shown that the use of this device increased the  $Pa_{O_2}$  of patients during one-lung ventilation. On occasion, we have used a similar device on patients who had poor oxygenation during one-lung ventilation. Our device differs in that the underwater seal (which serves as the pressure regulator) is placed in series with the airway, rather than in parallel (fig. 2). This is an important difference with respect to the safety of the device. In our system, occlusion of any of the tubing results in a gradual fall in the airway pressure as oxygen is absorbed. If the limb of their system going to the water seal is occluded (such as by stepping on it), the non-ventilated lung would be exposed to the full pressure of the oxygen source which could cause major barotrauma.

There is a second potential hazard with CPAP systems. If the surgeons should attempt to clear an open bronchus of blood or secretions and manage to fit a suction device snugly into the bronchus, the wall suction flow would greatly exceed the oxygen source flow, and negative pres-

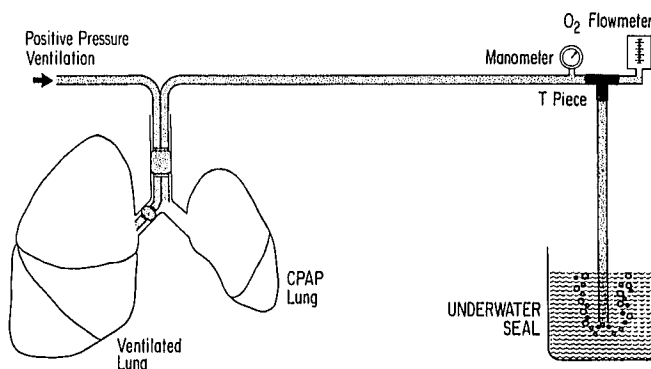

FIG. 1. Conventional method for instituting CPAP during one-lung ventilation.
